# Supplementary material for: Can Peri-Surgical Electroacupuncture Relieve Immunity Suppression? A Pilot Study in Dogs
Source: Preprints.org preprint supplement (doi:10.20944/preprints202310.1547.v1), 2023-10-25
Supplement: Supplementary file 3 [file supplementary]

|  | **RBC**  x106µL-1 | | | **WBC**  x103µL-1 | | | **Hb**  g dL-1 | | | **Ht**  % | | | **PLT**  x103µL-1 | | | **MCH**  pg | | | **MCHC**  g dL-1 | | | **MCV**  µ3 | | | **RDW**  % | | | **MPV**  µ3 | | |
| --- | --- | --- | --- | --- | --- | --- | --- | --- | --- | --- | --- | --- | --- | --- | --- | --- | --- | --- | --- | --- | --- | --- | --- | --- | --- | --- | --- | --- | --- | --- |
| ID. | T0 | T1 | T2 | T0 | T1 | T2 | T0 | T1 | T2 | T0 | T1 | T2 | T0 | T1 | T2 | T0 | T1 | T2 | T0 | T1 | T2 | T0 | T1 | T2 | T0 | T1 | T2 | T0 | T1 | T2 |
| EAP1 | 5.8 | 6.4 | 6.8 | 14.8 | 10.4 | 18.5 | 12.9 | 14.2 | 15.2 | 37.6 | 41.9 | 44 | 385 | 243 | 372 | 22.1 | 22.2 | 22.2 | 34.3 | 33.9 | 34.5 | 64.3 | 65.4 | 64.2 | 16.9 | 18.4 | 18.7 | 10.3 | 11.5 | 10.1 |
| EAP 2 | 6.2 | 5.3 | 5.5 | 18.4 | 16.7 | 14.2 | 15.1 | 12.9 | 13.5 | 44.1 | 38.5 | 39.8 | 438 | 462 | 422 | 24.5 | 24.4 | 24.5 | 34.2 | 33.5 | 33.9 | 71.6 | 72.9 | 72.4 | 19 | 16.3 | 17.2 | 10.1 | 11.1 | 9.6 |
| EAP 3 | 7.5 | 6.1 | 6.5 | 13.5 | 13.7 | 12.6 | 18.3 | 14.8 | 15.7 | 50.6 | 44 | 45.6 | 213 | 236 | 233 | 24.4 | 24.1 | 24.1 | 36.2 | 33.6 | 34.4 | 67.4 | 71.8 | 70 | 20.3 | 17.9 | 18.5 | 11.7 | 12.4 | 12 |
| EAP 4 | 7.6 | 5.6 | 7 | 14.8 | 14.5 | 13.4 | 17.5 | 15.6 | 16.4 | 49.4 | 38.8 | 47.8 | 211 | 190 | 237 | 23 | 27.9 | 23.3 | 35.4 | 40.2 | 34.3 | 65 | 69.3 | 67.8 | 19.8 | 15.6 | 18.9 | 10.5 | 9.7 | 11.8 |
| EAP 5 | 7.2 | 6 | 6.1 | 19.5 | 16.2 | 15.2 | 16.4 | 14 | 14.1 | 46.1 | 41.6 | 41.7 | 201 | 192 | 184 | 22.9 | 23.2 | 23 | 35.6 | 33.7 | 33.8 | 64.4 | 68.9 | 68.1 | 20.2 | 18.2 | 18.1 | 11.6 | 11.4 | 11.6 |
| EAP 6 | 7.2 | 5.9 | 7.3 | 15.4 | 13.7 | 12.3 | 16.8 | 13.8 | 16.9 | 41.5 | 40.2 | 49.5 | 164 | 138 | 163 | 23.3 | 23.5 | 23.3 | 35.4 | 34.3 | 34.2 | 66 | 68.6 | 68.2 | 20.9 | 18.2 | 19.9 | 13.5 | 12.6 | 12.4 |
| CTR 1 | 7.9 | 6.9 | 7.7 | 13.1 | 10.2 | 11.9 | 19.6 | 16.9 | 18.8 | 53.5 | 47.9 | 52.4 | 311 | 172 | 278 | 24.6 | 24.6 | 24.5 | 36.6 | 35.3 | 35.9 | 67.1 | 69.7 | 67.3 | 20.1 | 18.7 | 20.1 | 11.3 | 11.9 | 11.3 |
| CTR 2 | 8 | 7 | 7.1 | 13.1 | 11.6 | 10.2 | 19.6 | 17.1 | 17.2 | 54.4 | 47.7 | 46.7 | 170 | 174 | 164 | 24.4 | 24.3 | 24.3 | 36 | 35.8 | 36.8 | 67.7 | 67.8 | 66 | 21.1 | 20.2 | 20.1 | 12.9 | 13 | 13.1 |
| CTR 3 | 6.7 | 5.4 | 5.7 | 11.4 | 8.2 | 8 | 16 | 13.1 | 13.2 | 47.9 | 39.4 | 40.1 | 230 | 212 | 139 | 23.8 | 24.1 | 23.3 | 33.4 | 33.2 | 32.9 | 71.2 | 72.6 | 70.7 | 19.1 | 16.3 | 17.8 | 12.3 | 12.6 | 12.3 |
| CTR 4 | 6.8 | 6.4 | 6.6 | 12.7 | 10.6 | 10.9 | 15.3 | 14.3 | 14.8 | 44 | 42.1 | 41.1 | 276 | 288 | 258 | 22.5 | 22.3 | 22.3 | 34.8 | 34 | 36 | 64.6 | 65.7 | 62 | 20 | 19.6 | 19.6 | 11.6 | 12 | 11.2 |
| CTR 5 | 7.7 | 6.8 | 6.7 | 12.7 | 13 | 10 | 18.3 | 16.2 | 16 | 52.7 | 45.9 | 45.6 | 193 | 192 | 199 | 23.7 | 23.9 | 23.7 | 34.7 | 35.3 | 35.1 | 68.4 | 67.6 | 67.7 | 19.9 | 18.8 | 18.3 | 12.8 | 13 | 13 |
| CTR 6 | 6.8 | 5.7 | 5.6 | 14.5 | 12.1 | 11.4 | 17.2 | 14.4 | 14.1 | 47.8 | 41.6 | 41.3 | 284 | 310 | 287 | 25.4 | 25.4 | 25.3 | 36 | 34.6 | 34.1 | 70.5 | 73.4 | 74.1 | 20.4 | 17.8 | 16.8 | 11.5 | 11.7 | 11.2 |

**Appendix A**. Hematological parameters in EAP and CTR groups at each time point

RBC: total red blood cell count, WBC: total white blood cell count, Hb: hemoglobin, Ht: hematocrit, PLT: platelet count, MCH: mean cell hemoglobin, MCHC: MCH concentration, MCV: mean cell volume, RDW: red cell distribution width, MPV: mean platelet volume.

T0: at the time of induction of anesthesia, T1: 30 min after T0, T2: 2 hours after T0
